# Supplementary material
Source: HighWire-hosted journal article supplement (https://www.annfammed.org/highwire/filestream/8895/field_highwire_adjunct_files/0/Frith-INNOV-Supp_app.pdf)
Supplement: Frith-INNOV-Supp_app.pdf [file Frith-INNOV-Supp_app.pdf]

## Supplemental material for

Frith J. Fall prevention: empowering people through online education. *Ann Fam Med* 2017;15: p-p.

James Frith, PhD<sup>1,2</sup>

<sup>1</sup>Institute of Cellular Medicine, Newcastle University, Newcastle upon Tyne, United Kingdom

<sup>2</sup>The Newcastle upon Tyne Hospitals NHS Foundation Trust, United Kingdom

**Funding support:** The author is supported by the UK National Institute for Health Research Clinician Scientist Award (NIHR CS-2014-002).

**Disclaimer:** The views expressed in this publication are those of the author and not necessarily those of the National Health Service, the National Institute for Health Research or the Department of Health.

## References

1. Matheson J. The UK population: how does it compare? *Popul Trends*. 2010 Winter;(142):6-29.
2. Cigolle CT, Ha J, Min LC, Lee PG, Gure TR, Alexander NB, Blaum CS. The epidemiologic data on falls, 1998-2010: more older Americans report falling. *JAMA Intern Med*. 2015 Mar;175(3):443-5.
3. Burns ER, Stevens JA, Lee R. The direct costs of fatal and non-fatal falls among older adults - United States. *J Safety Res*. 2016 Sep;58:99-103.
4. Newcastle University. Should we retire the phrase "Silver Surfer"? 2016. <https://about.futurelearn.com/blog/should-we-retire-the-phrase-silver-surfer>. Accessed August 12, 2017.
5. Jordan K. MOOC Completion Rates: The Data. 2015. <http://www.katyjordan.com/MOOCproject.html>. Accessed August 12, 2017.
6. Morrell RW, Mayhorn CB, Bennett J. A survey of World Wide Web use in middle-aged and older adults. *Hum Factors*. 2000 Summer;42(2):175-82.
